# Supplementary material for: Growth hormone (GH) dose-dependent IGF-I response relates to pubertal height gain
Source: PubMed Central journal article supplement (PMC4683753; doi:10.1186/s12902-015-0080-8), 2015-12-18
Supplement: 12902_2015_80_MOESM1_ESM.pdf [file 12902_2015_80_MOESM1_ESM.pdf]

**Supplementary Table 1. Baseline characteristics according to randomization group: at birth, at GH start and at study start.**

|                                            | 33x1           | 67x1           | 33x2                    | 67x1+33x2           |
|--------------------------------------------|----------------|----------------|-------------------------|---------------------|
| <b>IIGHD, n=104</b>                        | <b>n=38</b>    | <b>n=30</b>    | <b>n=36</b>             | <b>n=66</b>         |
| <b>ITT, all</b>                            | <b>Mean±SD</b> | <b>Mean±SD</b> | <b>Mean±SD</b>          | <b>Mean±SD</b>      |
| <b>At birth</b>                            |                |                |                         |                     |
| BL <sub>SDS</sub>                          | -0.9±0.95      | -1.1±1.24      | -0.7±1.25               | -0.9±1.5            |
| BW <sub>SDS</sub>                          | -0.8±1.14      | -0.8±1.35      | -0.5±1.41               | -0.7±1.8            |
| Gestational age, weeks                     | 39.1±2.16      | 39.4±1.52      | 39.4±1.73               | 39.4±1.3            |
| Midparental height <sub>SDS</sub>          | -1.3±1.00      | -1.2±0.97      | -1±0.93                 | -1.1±0.4            |
| Mother's height <sub>SDS</sub>             | -1.0±0.82      | -0.6±1.15      | -1±0.94                 | -0.8±1.4            |
| Father's height <sub>SDS</sub>             | -1.2±1.09      | -1.2±0.88      | -0.7±0.86 <sup>ab</sup> | -0.9±0.9            |
| ΔHeight <sub>SDS</sub> 0-3 years           | -1.3±0.96      | -1.3±1.23      | -1.7±1.31               | -1.5±1.8            |
| <b>At GH start</b>                         |                |                |                         |                     |
| Age at GH start, years                     | 10.1±3.1       | 9.9±3.54       | 9.6±3.04                | 9.8±3.5             |
| Bone age delay, years                      | -1.7±1.10      | -1.8±0.86      | -1.9±1.3                | -1.8±1.             |
| ΔHeight <sub>SDS</sub> , pretreatment year | -0.2±0.69      | -0.2±0.66      | -0.1±0.25               | -0.1±0.8            |
| Height <sub>SDS</sub>                      | -2.7±0.54      | -3±0.83        | -2.8±0.63               | -2.9±0.3            |
| BMI <sub>SDS</sub>                         | -0.6±0.87      | -0.6±1.07      | -0.5±1.1                | -0.6±1.7            |
| diffH-MPH <sub>SDS</sub>                   | -1.3±1.06      | -1.7±1.17      | -1.7±0.85 <sup>a</sup>  | -1.7±1 <sup>d</sup> |
| IGF-I <sub>SDS</sub>                       | -1.4±1.51      | -1.2±1.25      | -1.1±1.66               | -1.1±1.5            |
| GH <sub>max</sub> AITT, mU/L               | 18.0±9.03      | 17.1±11.1      | 18.6±10.92              | 17.9±10.3           |
| GH <sub>max</sub> 24h, mU/L                | 32.1±19.55     | 26.6±16.8      | 37.4±24.62              | 32.3±21.8           |
| GH <sub>max</sub> AITT/24h, mU/L           | 20.6±15.04     | 17.9±12.13     | 22.5±16.18              | 20.4±14.6           |
| <b>1 year after GH start</b>               |                |                |                         |                     |
| Height <sub>SDS</sub> 1st treatment year   | -0.2±0.57      | -2.1±0.64      | -2±0.66                 | -2±0.5              |
| ΔH <sub>SDS</sub> , 1st treatment year     | 0.7±0.26       | 0.9±0.79       | 0.8±0.28                | 0.8±0.7             |
| <b>At study start (Randomization)</b>      |                |                |                         |                     |
| Age, years                                 | 13.5±1.32      | 13.7±1.56      | 13.4±1.24               | 13.5±1.39           |
| Bone age delay, years                      | -1.1±0.93      | -1.2±1.00      | -1.3±1.32               | -1.3±1.7            |
| IGF-I <sub>SDS</sub>                       | 1.0±1.02       | 0.8±1.33       | 1±1.29                  | 0.9±1.31            |
| Years from puberty onset                   | 0.6±0.50       | 0.7±1,12       | 0.8±0.78                | 0.7±0.94            |
| ΔHeight, to randomisation, cm              | 6±4.03         | 7.1±8,14       | 7.8±5.93                | 7.5±6.97            |
| ΔBone age from GH start, years             | 0.6±1.09       | 0.5±0,86       | 0.6±1                   | 0.5±0.93            |

<sup>a</sup>p=0.034; <sup>b</sup>p=0.022; <sup>c</sup>p=0.028; <sup>d</sup>p=0.021

BW, birth weight; BL, birth length; BMI, body mass index; GH<sub>max</sub>AITT/24h, maximum GH level during AITT (arginin–insulin tolerance test) or during a spontaneous 24h GH profile; ΔHeight, gain in height; IGF-I, insulin-like growth factor I; MPH, midparental height; diffH-MPH<sub>SDS</sub>, the difference between the child's height<sub>SDS</sub> vs MPH<sub>SDS</sub>; SDS, standard deviation score.

**Supplementary Table 2. Baseline characteristics according to gender and infancy–childhood transition (ICT): at birth, at GH start, at study start and at adult height.**

| ITT                                         | Boys       | Girls      | ALL        | P      | Normal ICT | DICT       | p     |
|---------------------------------------------|------------|------------|------------|--------|------------|------------|-------|
|                                             | n=90       | n=14       | n=104      |        | n=59       | n=33       |       |
|                                             | Mean±SD    | Mean±SD    | Mean±SD    |        | Mean±SD    | Mean±SD    |       |
| <b>At birth</b>                             |            |            |            |        |            |            |       |
| BL <sub>SDS</sub> .                         | -0.9±1.12  | -0.7±1.29  | -0.9±1.14  | 0.871  | -1.1±1.15  | -0.6±0.89  | 0.086 |
| BW <sub>SDS</sub> .                         | -0.8±1.3   | -0.2±1.16  | -0.7±1.29  | 0.209  | -1±1.26    | -0.3±1.14  | 0.014 |
| Gestational age, weeks                      | 39.2±1.91  | 39.6±1.28  | 39.3±1.84  | 0.541  | 39.2±1.79  | 39.3±1.9   | 0.648 |
| Midparental height <sub>SDS</sub>           | -1.2±0.96  | -0.8±0.98  | -1.2±0.97  | 0.199  | -1.2±0.92  | -1.1±1.02  | 0.974 |
| Mother's height <sub>SDS</sub>              | -0.9±0.92  | -0.4±1.18  | -0.9±0.97  | 0.177  | -0.9±1     | -0.8±0.94  | 0.616 |
| Father's height <sub>SDS</sub>              | -1±0.97    | -0.9±1.05  | -1±0.98    | 0.710  | -1±0.87    | -1±1.12    | 0.899 |
| ΔHeight <sub>SDS</sub> 0-3 years            | -1.3±1.05  | -2±1.73    | -1.4±1.17  | 0.072  | -1.2±1.25  | -1.9±0.93  | 0.001 |
| <b>At GH start</b>                          |            |            |            |        |            |            |       |
| Age at GH start, years                      | 10.2±3     | 7.4±3.37   | 9.9±3.19   | 0.002  | 10.3±3     | 8.5±3.28   | 0.006 |
| Bone age delay, years                       | -1.8±0.99  | -1.6±1.76  | -1.8±1.1   | 0.766  | -1.8±1.18  | -1.7±1.02  | 0.392 |
| ΔHeight <sub>SDS</sub> , pretreatment year  | -0.1±0.27  | -0.5±1.37  | -0.1±0.57  | 0.732  | -0.2±0.7   | -0.1±0.33  | 0.555 |
| Height <sub>SDS</sub>                       | -2.7±0.55  | -3.2±1.13  | -2.8±0.67  | 0.103  | -2.7±0.69  | -3±0.58    | 0.006 |
| BMI <sub>SDS</sub>                          | -0.6±0.99  | -0.4±1.08  | -0.6±1     | 0.331  | -0.8±0.93  | -0.3±1.09  | 0.027 |
| diffH-MPH <sub>SDS</sub>                    | -1.5±1     | -2.1±1.16  | -1.6±1.04  | 0.081  | -1.4±1     | -1.8±1.07  | 0.075 |
| IGF-I <sub>SDS</sub>                        | -1.2±1.5   | -1.5±1.25  | -1.3±1.47  | 0.577  | -0.9±0.95  | -1.9±2.04  | 0.014 |
| GHmaxAITT, mU/L                             | 18.6±10.38 | 14±8.7     | 17.9±10.23 | 0.180  | 19.8±10.22 | 14.8±11.22 | 0.030 |
| GHmax24h, mU/L                              | 31.1±19.63 | 41.3±27.41 | 32.2±20.57 | 0.409  | 34.9±19.2  | 30.8±23.64 | 0.371 |
| GHmaxAITT/24h, mU/L                         | 21±14.96   | 17.5±12.67 | 20.5±14.66 | 0.403  | 21.8±13.6  | 19.7±18.34 | 0.130 |
| <b>1 year after GH start</b>                |            |            |            |        |            |            |       |
| Height <sub>SDS</sub> 1st treatment year    | -2±0.58    | -2.2±0.83  | -2±0.62    | 0.782  | -2±0.55    | -2.2±0.65  | 0.051 |
| ΔHeight <sub>SDS</sub> , 1st treatment year | 0.7±0.27   | 1±1.13     | 0.8±0.48   | 0.481  | 0.7±0.58   | 0.8±0.29   | 0.368 |
| <b>At study start (Randomization)</b>       |            |            |            |        |            |            |       |
| Age, years                                  | 13.7±1.25  | 12.3±1.45  | 13.5±1.36  | 0.001* | 13.5±1.36  | 13.4±1.42  | 0.754 |
| Bone age delay, years                       | -1.3±1.09  | -0.9±1.07  | -1.2±1.09  | 0.209  | -1.3±1.1   | -1.1±1.11  | 0.281 |
| IGF-I <sub>SDS</sub>                        | 1±1.12     | 0.5±1.63   | 0.9±1.21   | 0.371  | 0.9±1.32   | 0.8±1.12   | 0.386 |
| Years from puberty onset                    | 0.7±0.84   | 0.6±0.62   | 0.7±0.81   | 0.826  | 0.6±0.48   | 0.9±1.07   | 0.246 |
| ΔHeight to randomization cm                 | 7±6.34     | 6.4±4.21   | 7±6.08     | 0.917  | 6±4.01     | 8.6±7.59   | 0.092 |
| ΔBone age from GH start, years              | 0.5±1      | 0.8±0.92   | 0.6±0.99   | 0.534  | 0.5±1.06   | 0.7±0.81   | 0.474 |
| ΔHeight vs GH start, cm                     | 24.6±15.64 | 38.2±26.22 | 26.3±17.75 | 0.048  | 23.1±16.57 | 34.5±19.07 | 0.002 |
| <b>At Adult Height</b>                      |            |            |            |        |            |            |       |
| Age, years                                  | 18.8±1.46  | 17.1±1.2   | 18.6±1.53  | 0.000  | 18.5±1.28  | 18.4±1.65  | 0.906 |
| Adult height <sub>SDS</sub>                 | -1±0.82    | -0.8±0.9   | -1±0.83    | 0.469  | -1±0.68    | -0.9±1     | 0.515 |
| diffH-MPH <sub>SDS</sub>                    | 0.2±0.98   | 0±0.85     | 0.2±0.96   | 0.376  | 0.2±0.89   | 0.2±1.16   | 0.594 |
| Total gain in height <sub>SDS</sub>         | 1.8±0.82   | 2.4±1.45   | 1.8±0.94   | 0.105  | 1.7±0.92   | 2.1±0.96   | 0.048 |
| Prepubertal gain in height <sub>SDS</sub>   | 1.1±0.65   | 2.2±1.74   | 1.2±0.95   | 0.006  | 1.1±1.02   | 1.5±0.91   | 0.022 |
| Pubertal gain in height <sub>SDS</sub>      | 0.7±0.75   | 0.2±0.73   | 0.6±0.76   | 0.029  | 0.6±0.71   | 0.6±0.83   | 0.760 |
| Years from puberty onset                    | 5.8±1.47   | 5.4±1.17   | 5.7±1.3    | 0.545  | 5.6±1.29   | 5.9±1.35   | 0.299 |

|                           |          |          |          |       |          |         |       |
|---------------------------|----------|----------|----------|-------|----------|---------|-------|
| Years from GH start       | 8.5±2.86 | 9.7±3.53 | 8.7±2.96 | 0.261 | 8.2±2.7  | 10±3.26 | 0.008 |
| Years on GH at AH         | 7.5±2.86 | 8.6±3.35 | 7.6±2.94 | 0.170 | 7.1±2.52 | 9±3.45  | 0.008 |
| Years in study after rand | 5.1±1.42 | 4.8±1.33 | 5±1.41   | 0.523 | 5±1.34   | 5.1±1.4 | 0.874 |

\*Sign by definition

BW, birth weight; BL, birth length; BMI, body mass index; DICT, delayed infancy–childhood transition; GH<sub>max</sub>AITT/24h, maximum GH level during AITT (arginin-insulin tolerance test) or during a spontaneous 24h GH profile; ΔHeight, gain in height; IGF-I, insulin-like growth factor I; MPH, midparental height; diffH-MPH<sub>SDS</sub>, the difference between the child's height<sub>SDS</sub> vs MPH<sub>SDS</sub>; SDS, standard deviation score.
